# Supplementary material for: Changes in Bacterial and Fungal Soil Communities in Long-Term Organic Cropping Systems
Source: MDPI journal article supplement (doi:10.3390/agriculture11050445), 2021-05-15
Supplement: s1 [file s1]

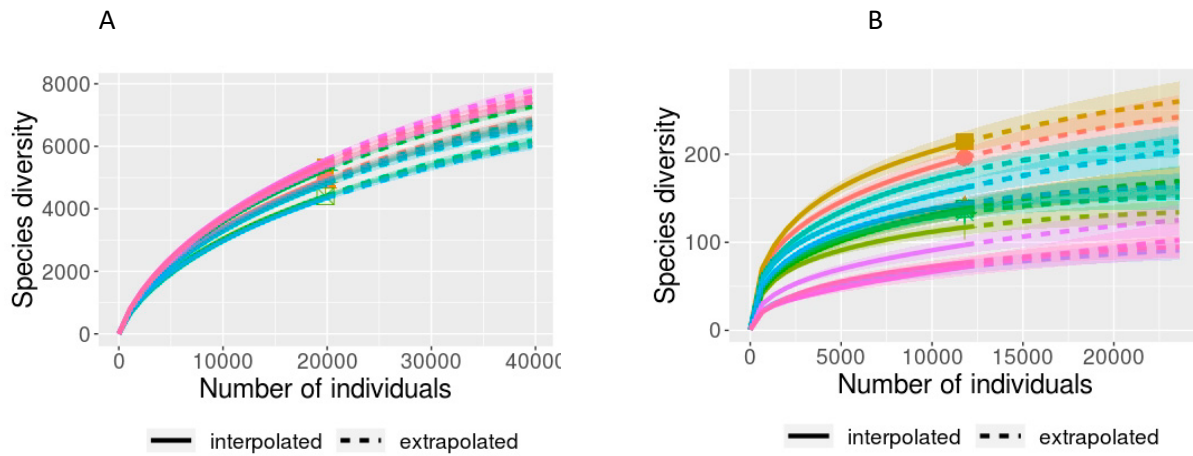

**Figure S1.** Rarefaction curves for the (A) bacterial (B) fungal soil sequences. The curves were obtained after getting the same depth in the samples, 19840 sequences in bacterial data and 15900 sequences in fungal data. (Species diversity = Chao1)

**Table S1.** Characteristics of organic amendments. (mean  $\pm$  standard deviation, (n=3))

|                | TOC<br>g kg <sup>-1</sup> /<br>mg L <sup>-1</sup> | Total N<br>g kg <sup>-1</sup> /<br>mg L <sup>-1</sup> | C/N            | Ca<br>g kg <sup>-1</sup> /<br>mg L <sup>-1</sup> | Mg<br>g kg <sup>-1</sup> /<br>mg L <sup>-1</sup> | P<br>g kg <sup>-1</sup> /<br>mg L <sup>-1</sup> | K<br>g kg <sup>-1</sup> /<br>mg L <sup>-1</sup> | Na<br>g kg <sup>-1</sup> /<br>mg L <sup>-1</sup> |
|----------------|---------------------------------------------------|-------------------------------------------------------|----------------|--------------------------------------------------|--------------------------------------------------|-------------------------------------------------|-------------------------------------------------|--------------------------------------------------|
| Manure         | 101 $\pm$ 18                                      | 3.9 $\pm$ 0.3                                         | 24.9 $\pm$ 3.5 | 185.6 $\pm$ 25.3                                 | 8.4 $\pm$ 1.0                                    | 0.9 $\pm$ 0.1                                   | 17.6 $\pm$ 3.9                                  | 1.5 $\pm$ 0.8                                    |
| Compost        | 110 $\pm$ 13                                      | 8.3 $\pm$ 0.5                                         | 13.4 $\pm$ 1.8 | 161.6 $\pm$ 13.9                                 | 10.2 $\pm$ 0.6                                   | 1.3 $\pm$ 0.1                                   | 36.2 $\pm$ 6.0                                  | 3.1 $\pm$ 1.0                                    |
| Compost<br>tea | 143 $\pm$ 19.6                                    | 21.1 $\pm$ 6.8                                        | 7.2 $\pm$ 1.7  | 59.0 $\pm$ 12.5                                  | 48.9 $\pm$ 7.9                                   | 12.7 $\pm$ 3.3                                  | 203.5 $\pm$ 29.9                                | 246.1 $\pm$ 34.1                                 |

**Table S2.** Diversity index (Chao1 and Shannon) for the bacterial and fungal community in the three cropping systems. (mean±SD (n=5)).

| <b>Bacterial</b> |                |                |                |              |
|------------------|----------------|----------------|----------------|--------------|
| <b>Index</b>     | <b>Conv</b>    | <b>Org_C</b>   | <b>Org_M</b>   | <b>ANOVA</b> |
| Chao1            | 8833.45±619.78 | 9718.96±665.32 | 8673.16±633.46 | ns           |
| Shannon          | 7.53±0.17      | 7.71±0.09      | 7.42±0.23      | ns           |
| <b>Fungal</b>    |                |                |                |              |
| <b>Index</b>     | <b>Conv</b>    | <b>Org_C</b>   | <b>Org_M</b>   | <b>ANOVA</b> |
| Chao1            | 229.52±76.17   | 138.24±36.25   | 201.55±42.45   | ns           |
| Shannon          | 2.84±0.60 a    | 1.27±0.35 b    | 2.56±0.41 a    | **           |

ns = non-significant; values followed by different letters correspond to significant differences (Tukey's test); significant levels: \*\*\* p < 0.001; \*\*, p < 0.01; \*, p < 0.05; Conv, Conventional system; Org\_C, Organic cultivation with manure compost and tea compost; Org\_M, Organic cultivation with manure.

**Table S3.** Relative abundance of most abundant (>1%) bacterial phyla in the three cropping systems.

| <b>Taxonomy</b>         | <b>Conv</b> | <b>Org_C</b> | <b>Org_M</b> |
|-------------------------|-------------|--------------|--------------|
| <b>Proteobacteria</b>   | 42.03±6.04  | 42.11±2.55   | 41.03±6.66   |
| <b>Actinobacteria</b>   | 17.78±4.12  | 15.00±3.36   | 16.40±4.74   |
| <b>Bacteroidetes</b>    | 14.66±4.03  | 9.92±2.20    | 11.42±3.08   |
| <b>Gemmatimonadetes</b> | 11.50±5.31  | 13.63±1.73   | 12.87±3.23   |
| <b>Acidobacteria</b>    | 5.7±1.39    | 8.07±1.74    | 8.07±2.23    |
| <b>Planctomycetes</b>   | 3.35±0.53   | 5.05±1.11    | 4.59±0.95    |
| <b>Chloroflexi</b>      | 1.85±0.13   | 2.6±0.20     | 2.41±0.64    |
| <b>Verrucomiota</b>     | 1.65±0.53   | 1.89±0.28    | 2.11±0.41    |
| <b>Firmicutes</b>       | 1.43±0.87   | 1.70±0.29    | 1.09±1.03    |

Conv, Conventional system; Org\_C, Organic cultivation with manure compost and tea compost; Org\_M, Organic cultivation with manure. Classified as uncultured and unknown were not shown. (Mean±SD (n=5))

**Table S4.** Relative abundance of most abundant (>1%) fungal phyla in the three cropping systems.

| <b>Taxonomy</b>          | <b>Conv</b> | <b>Org_C</b> | <b>Org_M</b> |
|--------------------------|-------------|--------------|--------------|
| <b>Olpidiomyota</b>      | 9.55±5.17   | 65.65±41.00  | 0.74±1.05    |
| <b>Basidiomycota</b>     | 21.84±12.63 | 23.50±47.00  | 36.62±23.57  |
| <b>Glomeromycota</b>     | 14.34±24.28 | 0.00±0.00    | 33.55±23.23  |
| <b>Ascomycota</b>        | 26.32±9.09  | 7.78±5.53    | 11.43±4.67   |
| <b>Mortierellomycota</b> | 20.79±7.29  | 3.07±1.86    | 15.24±6.12   |
| <b>Mucoromycota</b>      | 6.41±6.73   | 0.00±0.00    | 2.41±4.28    |
| <b>Chytridiomycota</b>   | 0.42±0.84   | 0.00±0.00    | 0.00±0.00    |

Conv, Conventional system; Org\_C, Organic cultivation with manure compost and tea compost; Org\_M, Organic cultivation with manure. Classified as uncultured and unknown were not shown. (mean±SD (n=5))

**Table S5.** NMDS results between bacterial community and the significant soil properties.

|     | NMDS1    | NMDS2    | r2     | Pr(>r)    |
|-----|----------|----------|--------|-----------|
| pH  | 0.31911  | 0.94772  | 0.0291 | 0.845     |
| TOC | 0.61792  | -0.78624 | 0.6047 | 0.005 **  |
| POC | -0.62080 | 0.78397  | 0.1902 | 0.291     |
| TN  | 0.69486  | -0.71915 | 0.5480 | 0.011 *   |
| Mg  | 0.65220  | -0.75805 | 0.4482 | 0.031 *   |
| K   | 0.68028  | -0.73295 | 0.2577 | 0.144     |
| NH4 | 0.44548  | -0.89529 | 0.6670 | 0.001 *** |
| NO3 | -0.23042 | 0.97309  | 0.1870 | 0.290     |
| Fe  | 0.62790  | -0.77829 | 0.2457 | 0.188     |
| Mn  | -0.05603 | -0.99843 | 0.1131 | 0.469     |
| B   | 0.50667  | -0.86214 | 0.4486 | 0.038 *   |
| TP  | -0.72397 | 0.68983  | 0.2281 | 0.204     |
| ALT | 0.06553  | -0.99785 | 0.0951 | 0.552     |
| FOX | 0.03293  | -0.99946 | 0.3318 | 0.114     |

Significant levels: \*\*\*  $p < 0.001$ ; \*\*,  $p < 0.01$ ; \*,  $p < 0.05$ ; TOC, Total Organic Carbon; TN, Total Nitrogen; POC, Particulate Organic Carbon; Mg, Available Mg; K, available K; Fe, available; Mn, available Mn; B, available B; TP, Total Pesticides; ALT, *Alternaria spp.*; FOX, *Fusarium Oxysporum*.

**Table S6.** NMDS results between fungal community and the significant soil properties.

|     | NMDS1    | NMDS2    | r2     | Pr(>r) |
|-----|----------|----------|--------|--------|
| pH  | -0.92374 | 0.38302  | 0.0036 | 0.979  |
| TOC | -0.64078 | -0.76772 | 0.0253 | 0.852  |
| POC | -0.99309 | -0.11735 | 0.0057 | 0.975  |
| TN  | -0.87791 | 0.47883  | 0.0228 | 0.886  |
| Mg  | -0.96714 | -0.25426 | 0.1068 | 0.596  |
| K   | -0.85364 | 0.52087  | 0.2280 | 0.271  |
| NH4 | -0.22551 | 0.97424  | 0.1201 | 0.516  |
| NO3 | 0.16120  | -0.98692 | 0.1488 | 0.448  |
| Fe  | -0.34307 | -0.93931 | 0.1793 | 0.394  |
| Mn  | 0.30863  | -0.95118 | 0.3478 | 0.124  |
| B   | 0.01558  | -0.99988 | 0.0219 | 0.888  |
| TP  | 0.61561  | -0.78805 | 0.3771 | 0.068  |
| ALT | 0.28907  | -0.95731 | 0.2485 | 0.248  |
| FOX | -0.19597 | -0.98061 | 0.2689 | 0.212  |

Significant levels: \*\*\*  $p < 0.001$ ; \*\*,  $p < 0.01$ ; \*,  $p < 0.05$ ; TOC, Total Organic Carbon; TN, Total Nitrogen; POC, Particulate Organic Carbon; Mg, available Mg; K, available K; Fe, available; Mn, available Mn; B, available B; TP, Total Pesticides; ALT, *Alternaria spp.*; FOX, *Fusarium Oxysporum*.
